# Supplementary material
Source: PubMed Central journal article supplement (PMC3401326)

Figure 1: one column, 89mm width

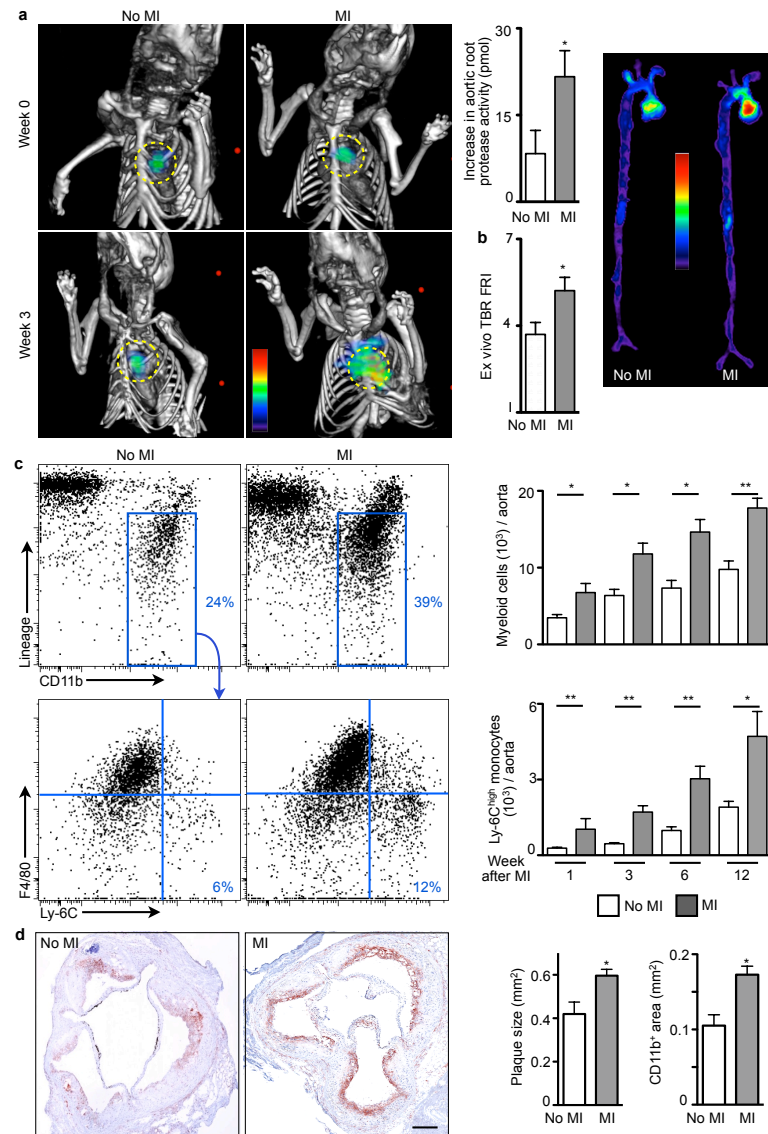

Figure 2: one column, 89mm width

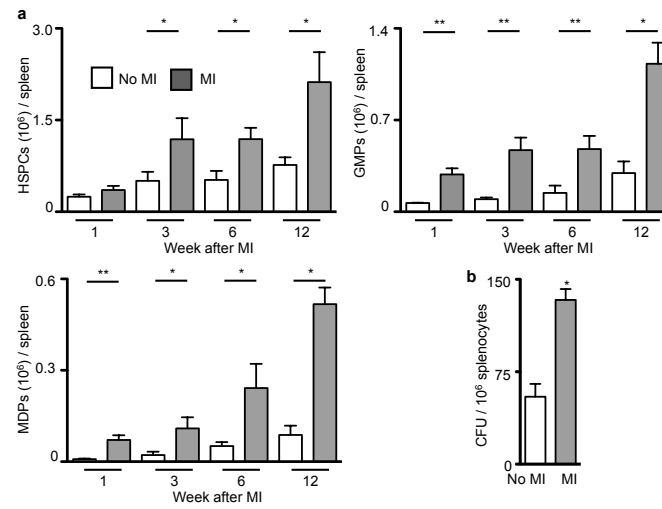

Figure 3: 1.33 columns, 120mm width

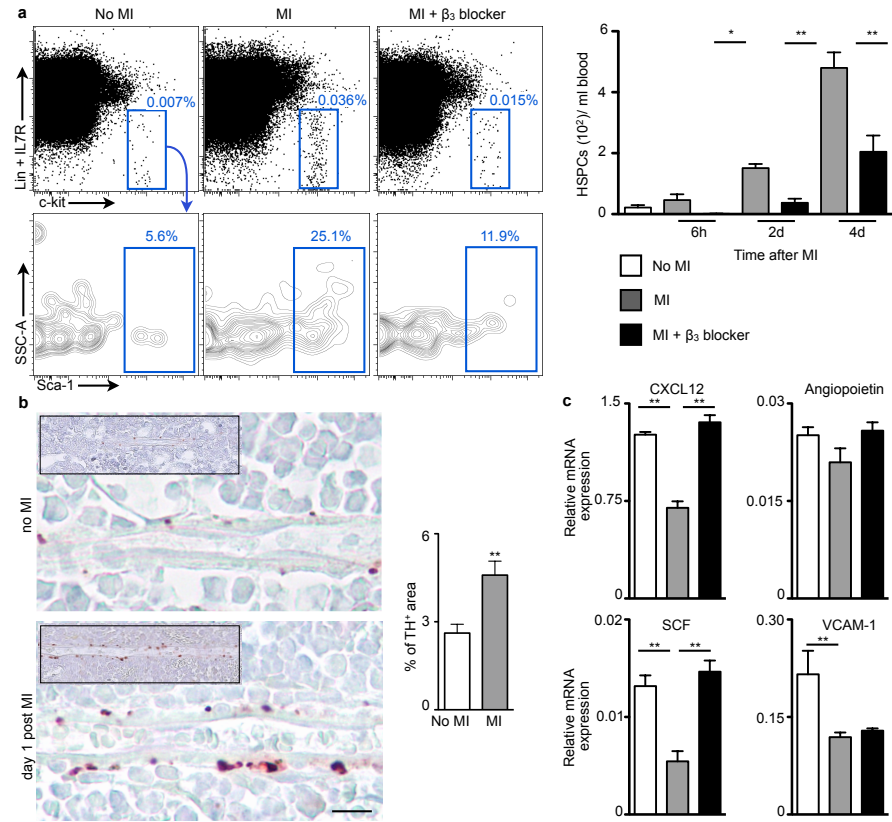

Figure 4: one column, 89mm width

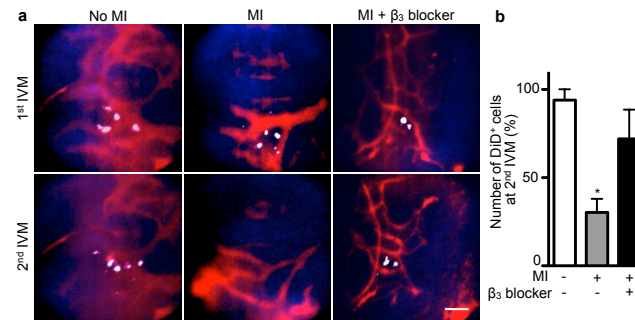

Figure 5: two columns, 180mm width

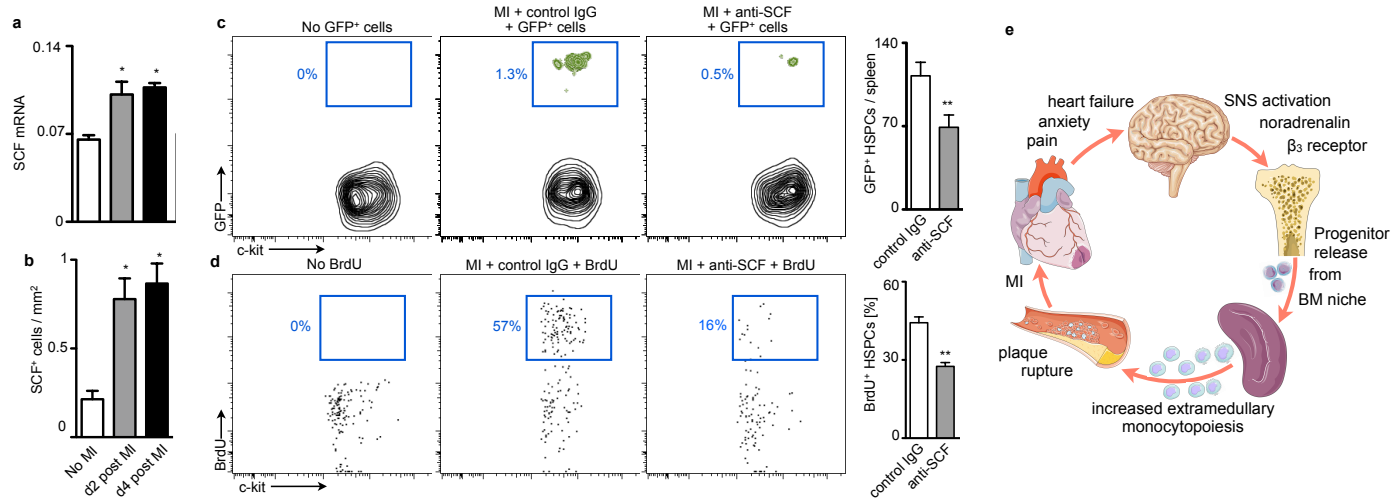

Summary cartoon in Fig. 5

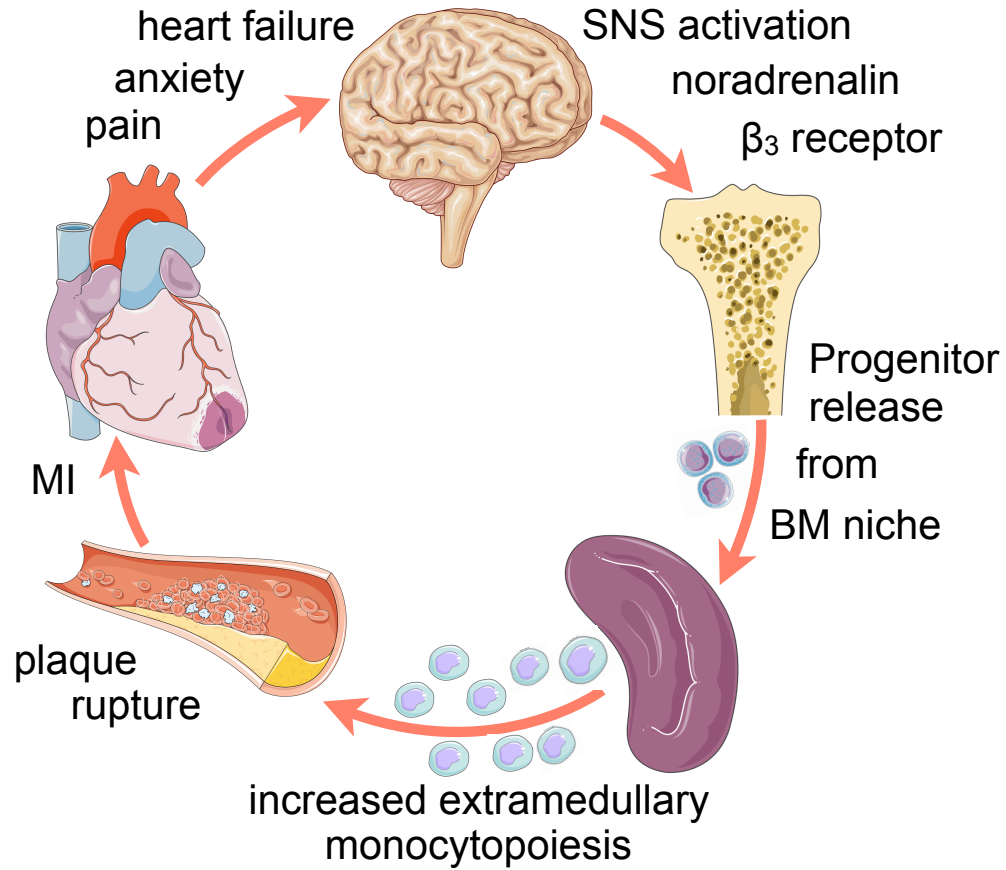

Supplement: NIHMS380684-supplement-3.pdf [file NIHMS380684-supplement-3.pdf]
